# Supplementary material
Source: PubMed Central journal article supplement (PMC18974)
Supplement: pnas_97_26_14656__2.pdf [file pnas_97_26_14656__2.pdf]

ParA and ParB homologues in bacterial chromosomes and plasmids

| organism                                    | chromosome/plasmid    | ParA/Soj*          | ParB/Spo0J*        | Classification      |
|---------------------------------------------|-----------------------|--------------------|--------------------|---------------------|
| <i>Archaeoglobus fulgidus</i>               | chromosome            | -                  | -                  | Archaea             |
| <i>Methanobacterium thermoautotrophicum</i> | chromosome            | MTH1456            | -                  | Archaea             |
| <i>Pyrococcus abyssi</i>                    | chromosome            | PAB0852            | -                  | Archaea             |
| <i>Pyrococcus horikoshii</i>                | chromosome            | PH0768             | -                  | Archaea             |
| <i>Methanococcus jannaschii</i>             | chromosome            | MJEC124            | -                  | Archaea             |
| <i>Aeropyrum pernix</i>                     | chromosome            | -                  | -                  | Archaea             |
| <i>Aquifex aeolicus</i>                     | chromosome            | -                  | -                  | Aquificales         |
| <i>Thermotoga maritima</i>                  | chromosome            | -                  | -                  | Thermotogales       |
| <i>Deinococcus radiodurans</i>              | chromosome I [2.6Mb]  | DR0013             | DR0012             | Thermus/Deinococcus |
| <i>Deinococcus radiodurans</i>              | chromosome II [0.4Mb] | DRA0001            | DRA0002            | Thermus/Deinococcus |
| <i>Deinococcus radiodurans</i> †            | megaplasmid           | DRB0001<br>DRB0031 | DRB0002<br>DRB0030 | Thermus/Deinococcus |
| <i>Deinococcus radiodurans</i>              | plasmid               | -                  | DRC0025            | Thermus/Deinococcus |
| <i>Mycobacterium avium</i>                  | chromosome            | +                  | +                  | Firmicutes          |
| <i>Mycobacterium leprae</i>                 | chromosome            | ORF278             | ORF333             | Firmicutes          |
| <i>Mycobacterium bovis</i>                  | chromosome            | +                  | +                  | Firmicutes          |
| <i>Mycobacterium tuberculosis</i>           | chromosome            | Rv3918c            | Rv3917c            | Firmicutes          |
| <i>Corynebacterium diphtheriae</i>          | chromosome            | +                  | +                  | Firmicutes          |
| <i>Streptomyces coelicolor</i>              | chromosome            | StH24.08           | StH24.09           | Firmicutes          |
| <i>Clostridium difficile</i>                | chromosome            | +                  | +                  | Firmicutes          |
| <i>Bacillus stearothermophilus</i>          | chromosome            | +                  | +                  | Firmicutes          |
| <i>Bacillus subtilis</i>                    | chromosome            | Soj                | Spo0J              | Firmicutes          |
| <i>Bacillus anthracis</i>                   | chromosome            | +                  | +                  | Firmicutes          |
| <i>Listeria monocytogenes</i>               | chromosome            | +                  | +                  | Firmicutes          |
| <i>Enterococcus faecalis</i>                | chromosome            | +                  | +                  | Firmicutes          |
| <i>Staphylococcus aureus</i>                | chromosome            | -                  | +                  | Firmicutes          |
| <i>Lactococcus lactis</i>                   | chromosome            | -                  | +                  | Firmicutes          |
| <i>Streptococcus mutans</i>                 | chromosome            | -                  | +                  | Firmicutes          |
| <i>Streptococcus pneumoniae</i>             | chromosome            | -                  | SPSpoJ             | Firmicutes          |
| <i>Ureaplasma urealyticum</i>               | chromosome            | -                  | -                  | Firmicutes          |
| <i>Mycoplasma genitalium</i>                | chromosome            | -                  | -                  | Firmicutes          |
| <i>Mycoplasma pneumoniae</i>                | chromosome            | -                  | -                  | Firmicutes          |
| <i>Clostridium acetobutylicum</i>           | chromosome            | +                  | +                  | Firmicutes          |
| <i>Porphyromonas gingivalis</i>             | chromosome            | +                  | +                  | CFB                 |
| <i>Chlorobium tepidum</i>                   | chromosome            | +                  | +                  | Green sulfur        |
| <i>Chlamydia pneumoniae</i>                 | chromosome            | CPn0805            | CPn0684            | Chlamydiales        |
| <i>Chlamydia trachomatis</i>                | chromosome            | CT582              | CT688              | Chlamydiales        |
| <i>Chlamydia psittaci</i>                   | chromosome            | +                  | +                  | Chlamydiales        |
| <i>Synechocystis</i> sp.                    | chromosome            | -                  | -                  | Cyanobacteria       |
| <i>Treponema denticola</i>                  | chromosome            | +                  | +                  | Spirochaetales      |
| <i>Treponema pallidum</i>                   | chromosome            | TP0272             | TP0271             | Spirochaetales      |
| <i>Borrelia burgdorferi</i>                 | chromosome            | BB0431             | BB0434             | Spirochaetales      |
| <i>Helicobacter pylori</i>                  | chromosome            | HP1139             | HP1138             | Proteobacteria      |
| <i>Campylobacter jejuni</i>                 | chromosome            | Cj0100             | Cj0101             | Proteobacteria      |
| <i>Desulfovibrio vulgaris</i>               | chromosome            | +                  | +                  | Proteobacteria      |
| <i>Geobacter sulfurreducens</i>             | chromosome            | +                  | +                  | Proteobacteria      |
| <i>Sinorhizobium meliloti</i>               | chromosome            | -                  | -                  | Proteobacteria      |
| <i>Caulobacter crescentus</i>               | chromosome            | ParA               | ParB               | Proteobacteria      |
| <i>Rhodobacter sphaeroides</i>              | chromosome            | -                  | -                  | Proteobacteria      |
| <i>Rickettsia prowazekii</i>                | chromosome            | RP058              | RP059              | Proteobacteria      |
| <i>Thiobacillus ferrooxidans</i>            | chromosome            | +                  | +                  | Proteobacteria      |
| <i>Ralstonia eutropha</i>                   | pMOL28                | ParA28             | ParB28             | Proteobacteria      |
| <i>Bordetella bronchiseptica</i>            | chromosome            | +                  | -                  | Proteobacteria      |
| <i>Bordetella pertussis</i>                 | chromosome            | +                  | +                  | Proteobacteria      |
| <i>Neisseria meningitidis</i> A             | chromosome            | NMA0076            | NMA0508            | Proteobacteria      |
| <i>Neisseria meningitidis</i> B             | chromosome            | NMB0191            | NMB1944            | Proteobacteria      |
| <i>Neisseria gonorrhoeae</i>                | chromosome            | +                  | +                  | Proteobacteria      |
| <i>Xylella fastidiosa</i>                   | chromosome            | XF2282             | XF2281             | Proteobacteria      |
| <i>Legionella pneumophila</i>               | chromosome            | -                  | -                  | Proteobacteria      |
| <i>Coxiella burnetii</i>                    | QpH1                  | QsopA              | QsopB              | Proteobacteria      |
| <i>Coxiella burnetii</i>                    | QpDV                  | SopA               | SPSpoJ             | Proteobacteria      |
| <i>Pseudomonas putida</i>                   | chromosome            | ORF263             | ORF290             | Proteobacteria      |
| <i>Pseudomonas aeruginosa</i>               | chromosome            | PA5563             | PA5562             | Proteobacteria      |
| <i>Shewanella putrefaciens</i>              | chromosome            | +                  | +                  | Proteobacteria      |
| <i>Escherichia coli</i>                     | chromosome            | -                  | -                  | Proteobacteria      |
| <i>Escherichia coli</i>                     | F                     | SopA               | SopB               | Proteobacteria      |
| <i>Escherichia coli</i>                     | Bacteriophage P1      | ParA               | ParB               | Proteobacteria      |
| <i>Escherichia coli</i>                     | Bacteriophage P7      | ParA               | ParB               | Proteobacteria      |
| <i>Escherichia coli</i>                     | Bacteriophage N15     | gp28               | gp27               | Proteobacteria      |
| <i>Escherichia coli</i> O157                | pO157                 | SopA               | SopB               | Proteobacteria      |
| <i>Shigella</i> sp.                         | invasion plasmid      | -                  | lpaR/VirB          | Proteobacteria      |
| <i>Buchnera</i> sp.                         | chromosome            | -                  | -                  | Proteobacteria      |
| <i>Salmonella typhimurium</i>               | chromosome            | -                  | -                  | Proteobacteria      |
| <i>Salmonella typhi</i>                     | chromosome            | -                  | -                  | Proteobacteria      |
| <i>Salmonella paratyphi</i> A               | chromosome            | -                  | -                  | Proteobacteria      |
| <i>Salmonella enteritidis</i>               | chromosome            | -                  | -                  | Proteobacteria      |
| <i>Yersinia enterocolitica</i>              | pYVe227               | SpyA               | SpyB               | Proteobacteria      |
| <i>Yersinia pestis</i>                      | chromosome            | -                  | -                  | Proteobacteria      |
| <i>Yersinia pestis</i>                      | pCD1                  | SopA               | SopB               | Proteobacteria      |
| <i>Yersinia pestis</i>                      | pMT1                  | ParA               | ParB               | Proteobacteria      |
| <i>Pasteurella multocida</i>                | chromosome            | -                  | -                  | Proteobacteria      |
| <i>Klebsiella pneumoniae</i>                | chromosome            | -                  | -                  | Proteobacteria      |
| <i>Actinobacillus actinomycetemcomitans</i> | chromosome            | -                  | -                  | Proteobacteria      |
| <i>Haemophilus influenzae</i>               | chromosome            | -                  | -                  | Proteobacteria      |
| <i>Vibrio cholerae</i>                      | chromosome [3.0Mb]    | VC2773             | VC2772             | Proteobacteria      |
| <i>Vibrio cholerae</i>                      | chromosome [1.1Mb]    | VCA1115            | VCA1114            | Proteobacteria      |
