# Supplementary material
Source: PubMed Central journal article supplement (PMC18974)
Supplement: pnas_97_26_14656__4.pdf [file pnas_97_26_14656__4.pdf]

|                                          |   |                                                                                                                              |     |
|------------------------------------------|---|------------------------------------------------------------------------------------------------------------------------------|-----|
| Lmon; <i>Listeria monocytogenes</i>      | 1 | -----                                                                                                                        | 1   |
| Bsub; <i>Bacillus subtilis</i>           | 1 | -----MG                                                                                                                      | 2   |
| Bant; <i>B. anthracis</i>                | 1 | -----MG                                                                                                                      | 2   |
| Bste; <i>B. stearothermophilus</i>       | 1 | -----KSFSCFRAKIKWIEEEEIEVGGIGG                                                                                               | 24  |
| Efae; <i>Enterococcus faecalis</i>       | 1 | -----MT                                                                                                                      | 2   |
| Cdif; <i>Clostridium difficile</i>       | 1 | -----MG                                                                                                                      | 2   |
| Cace; <i>C. acetobutylicum</i>           | 1 | -----M                                                                                                                       | 1   |
| Gsul; <i>Geobacter sulfurreducens</i>    | 1 | -----MA                                                                                                                      | 2   |
| Rpro; <i>Rickettsia prowazekii</i>       | 1 | -----M                                                                                                                       | 1   |
| Pgin; <i>Porphyromonas gingivalis</i>    | 1 | -----MG                                                                                                                      | 2   |
| Ctep; <i>Chlorobium tepidum</i>          | 1 | -----MG                                                                                                                      | 2   |
| Scoe; <i>Streptomyces coelicolor</i>     | 1 | -----                                                                                                                        | 1   |
| Cdip; <i>Corynebacterium diphtheriae</i> | 1 | -----MDDQSWDDTPIAAAAARRAAQVMTPTNLHLPRPERT                                                                                    | 35  |
| Mavi; <i>Mycobacterium avium</i>         | 1 | -----MRILHTTYPPLRRPKHR                                                                                                       | 17  |
| Mbov; <i>M. bovis</i>                    | 1 | -----MTPPTPTPEAAHNPTMNVSRETSTEFDTPIGAAAERAMRVLHTTHEPLQRPGR                                                                   | 54  |
| Mtub; <i>M. tuberculosis</i>             | 1 | -----MSAPWGPVAAGPSALVRSQASTIEPFQREMTPTPTPEAAHNPTMNVSRETSTEFDTPIGAAAERAMRVLHTTHEPLQRPGR                                       | 84  |
| Mlep; <i>M. leprae</i>                   | 1 | -----MRVLHTTYPDLPCRPCR                                                                                                       | 17  |
| Tpal; <i>Treponema pallidum</i>          | 1 | -----MG                                                                                                                      | 2   |
| Tden; <i>T. denticola</i>                | 1 | -----MG                                                                                                                      | 2   |
| Drad2.6; <i>Deinococcus radiodurans</i>  | 1 | -----MTDHAGGDDPAARHSENCRLWTCAPLRGSNRQAPRRCAGGARSDRRGM                                                                        | 48  |
| Ccre; <i>Caulobacter crescentus</i>      | 1 | -----MSANPL                                                                                                                  | 6   |
| Tfer; <i>Thiobacillus ferrooxidans</i>   | 1 | -----MEIRPVAM                                                                                                                | 8   |
| Xfas; <i>Xylella fastidiosa</i>          | 1 | -----MA                                                                                                                      | 2   |
| Paer; <i>Pseudomonas aeruginosa</i>      | 1 | -----MA                                                                                                                      | 2   |
| Pput; <i>P. putida</i>                   | 1 | -----MA                                                                                                                      | 2   |
| Sput; <i>Shewanella putrefaciens</i>     | 1 | -----VG                                                                                                                      | 2   |
| Vcho3.0; <i>Vibrio cholerae</i>          | 1 | -----VG                                                                                                                      | 2   |
| Cjej; <i>Campylobacter jejuni</i>        | 1 | -----MS                                                                                                                      | 2   |
| Hpyl; <i>Helicobacter pylori</i>         | 1 | -----MMS                                                                                                                     | 3   |
| megaplasmid (Dr) b                       | 1 | -MRRDTFAGRRTQQPACQIHRFARTDKCYRHQKNPAERRHFGLSQCPHRESIVFVYTKMYILLMDVDRVQVRAFRANIAEYLEQALQGQRIVIERHGGPVAALVPLADLYQITRKEKAMG     | 119 |
| Drad0.4 *                                | 1 | -----MVSAV                                                                                                                   | 5   |
| megaplasmid (Dr) a                       | 1 | -----MT                                                                                                                      | 2   |
| Vcho1.1 *                                | 1 | -----MKREQTIENLYQLAQLTQQVQADRIEIVLEERRRDEHFPPMSKALMETRSGLTRRKLDEAIAKMEEAGHQFTKNNANHYSISLSEAHMLMDAAGVPKFKHERKKNENKPK          | 108 |
| P1 (Ec; <i>Escherichia coli</i> )        | 1 | -----MSDSSQLHKVAQRANRMLNVLTEQVQLQKDELHANEFYQVYAKAALAKLPLLTRANVDYAVSEMEEKGYVFDKRPAGSSMKYAMSIQNIIDIYHRGVPKYRDRYSEA             | 108 |
| P7 (Ec)                                  | 1 | -----MKRDYGGVGTIALRASALLKAMSQDI EDQRKEFNQTEYYQTFTRNAVAKLPKLSRRIVEQA IKEMEDDGYQFNKKQVGNVEQYALTIQNVIDIYAHRKIPKYRDIHKSP         | 109 |
| pMT1 (Yp)                                | 1 | -----MKRDYGSVGTIALRASALLQAMSRDIEEQRKEFNLT EYHQTYTRNAVAKLPKLSRRIVELAVKEMEEESGYEFNKKQVGNVEQYALTIQNVIDIYAHRKIPKYRDIHKAP         | 109 |
| QpH1 (Cb; <i>Coxiella burnetii</i> )     | 1 | -----MLETQITPYGETPEQLMDKIFYQAGNEMLLTLRNYITSPDKRKKSRWTGAI EA AKMVGVSAPTFRKLL ESDNEVPGIIIEENENGRKIKKYTLTAI NNLRKAKTRYKRPKGSKP  | 115 |
| pMOL28 (Re; <i>Ralstonia eutropha</i> )  | 1 | -----MQWIRAE LKPVPRRGGP                                                                                                      | 17  |
| F (Ec)                                   | 1 | -----MFRMKLMETLNQCINAGHEMTKAI AIAQFNDD SPEARKITRRWRIGE AADLVGVSSQAIRDAEKAGRLPHPDMEIRGRVEQRVGYTTIEQINHMRDVFGRLLRRAEDVFP       | 109 |
| pO157 (Ec O157)                          | 1 | -----MFRMKLMETLNQCINAGHEMTKAI AIAQFNDD SPEARKITRRWRIGE AADLVGVSSQAIRDAEKAGRLPHPDMEIRGRVEQRVGYTTIEQINHMRDVFGRLLRRAEDVFP       | 109 |
| N15 (Ec)                                 | 1 | -----MSLINLLKDCINRGQEMTRAIAIAQFGDD SPEARRITRRWIGITEVADLIGVTPQAIRDAEKAGRLPAPDFEMRGRVERRAGYTTIDQISHMRSVFGNPNQRPPDDKNP          | 106 |
| pCD1 (Yp; <i>Yersinia pestis</i> )       | 1 | -----MDLKSTLDRCI ERGQFMTQEIAKSQFGNDS PAARTITRRWRITEA AELVGVTPTQIRNYEDSGKLPPPDTAMIGRVEQRTGYSIQQINDMRDVFKTRLSKPKGENP           | 106 |
| pYVe227 (Ye; <i>Y. enterocolitica</i> )  | 1 | MFYK DANFIEI IHMNLKSTLDRCI ERGQFMTQEIAKSQFGNDS PAARTITRRWRITEA AELVGVTPTQIRNYEDSGKLPPPDTAMIGRVEQRTGYSIQQINDMRDVFKTRLSKPKGENP | 120 |

## Walker A

## Box IV

|                    |     |                                                                                                                           |     |
|--------------------|-----|---------------------------------------------------------------------------------------------------------------------------|-----|
| Lmon               | 1   | -MIALANQKGGVGKTTSSVNLSSSLAFLG-----KVVLLVDI-DPQGNASSGVGVNKGE-----IEH-CIYDVLVDDVAIQDVLQKTDLDN-LNVIIPATIOQLAGAEVELVPAI       | 99  |
| Bsub               | 3   | KIIAATNQKGGVGKTTSSVNLGACLAYIG-----KRVLLVDI-DPQGNATSGLGIEKAD-----VEQ-CVYDILVDDADVIDIIKATTVEN-LDVIIPATIOQLAGAEIELVPTI       | 102 |
| Bant               | 3   | KIIAATNQKGGVGKTTSSVNLGAGLAQVG-----KVVLLVDI-DAQNATTGVGIEKSE-----LDQ-CIYNVLVEDADVQGVIOKTATEN-LDVLPIATIOQLAGAEIELVPTI        | 102 |
| Bste               | 25  | KVIATANQKGGVGKTTTAVNLSACLHLG-----KVVLLVDA-DPQGNATSGIGIERGD-----VDE-CIYNVIGDMKAKDVIRPTDIEN-LYVIPATIOQLAGAEIELVSVI          | 124 |
| Efae               | 3   | RIISVANQKGGVGKTTTAVNLGACLANLG-----KVVLLIDI-DAQNATSGMGVPKPD-----VAH-DVYDVLVNEEPITSVVQHTSREN-LDIVPATIOQLAGAEIELTSM          | 102 |
| Cdif               | 3   | KVIAVFNQKGGVGKTTTAVNLSASLGTLG-----KKILVLDL-DPQGNATSGYGINKNE-----VEN-TIYEIMLDGLHIKEAISTEFEN-IDVVPATELSGAEIELTSKT           | 102 |
| Cace               | 2   | KVISVFNQKGGVGKTTTAVNLCTYLAMKG-----LKVLTIDI-DPQGNATSGLGIDKST-----LEL-STYDALTTDVALEDIIQESQLIKNLYTAPSTVELAGAEVELINID         | 102 |
| Gsul               | 3   | KIICIANQKGGVGKTTTAVNLAASLAAAE-----KQTLVDM-DPQGNAGSGVGVKAG-----LEE-SVYDAIINDVPSGLIVGTDLAH-LDLLPSTTDLAGAEIELVSM             | 102 |
| Rpro               | 2   | KIISVFNQKGGVAKTTTAVNLATAFASVN-----KKILVIDL-DPQGNSSGFGIIQQQ-----RKN-TIYQVLTNLIELKDAIATNIPN-LEIITSNTNLSAAELDTTLK            | 101 |
| Pgin               | 3   | KIIAATANQKGGVGKTTTAVNLAASLATLE-----KVVLLVDA-DPQGNASSGLGVDIAS-----LQN-TVYECLVGNLPAEAVQPTPVEG-LDIIPSHIDLVGAEIEMLNLP         | 102 |
| Ctep               | 3   | RVIAATANQKGGVGKTTTAVNLAASIAISE-----FKTLLIDI-DPQANATSGFLETGD-----EIENTFYNVVMNGGEIRDAIKPSGLEI-LDVLPSNVNLVGMVEELVNM          | 103 |
| Scoe               | 1   | --MVVANQKGGVGKTTTAVNLAASLALHG-----ARVLVVDL-DPQGNASTALGIDHH-----ADVPSIDVVLVESRPLSEVVQVPDVEGLFCAPATIDLAGAEIELVSLV           | 99  |
| Cdip               | 36  | RRLTVANQKGGVGKTTSSVNLAAAGLALGG-----LKVLLVDL-DPQGNASTALGADHR-----AGTLSSYEMLI GECTAEELQOSTASENFLFCIPATIDLAGAEIELVSLV        | 136 |
| Mavi               | 18  | RVFTVANQKGGVGKTTTAVNLAALALQG-----LKTLLVIDL-DPQGNASTALGITDRQ-----SGTPSSYEVLLGEVSVHDALRQSPHNERLFCIPATIDLAGAEIELVSM          | 119 |
| Mbov               | 55  | RVLTVANQKGGVGKTTTAVNLAALAVQG-----LKTLLVIDL-DPQGNASTALGITDRQ-----SGTPSSYEMLI GEVSLHTALRRSPHNERLFCIPATIDLAGAEIELVSM         | 156 |
| Mtub               | 85  | RVLTVANQKGGVGKTTTAVNLAALAVQG-----LKTLLVIDL-DPQGNASTALGITDRQ-----SGTPSSYEMLI GEVSLHTALRRSPHNERLFCIPATIDLAGAEIELVSM         | 186 |
| Mlep               | 18  | RLFTVANQKGGVGKTTTAVNLAALALQG-----LKALVIDL-DPQGNASTALGISNRQ-----SRVFSSYDVLIGEVSQTALRCSPYNERLFCIPAAIDLAGAEIELVSM            | 119 |
| Tpal               | 3   | KTIVFVNQKGGVGKTTSAINLGAYLALAG-----KKTLLVDF-DPQGNMSSGLGLARG-----LTVDLLAGKAHINSVLRTPVHN-LFAIPASIDLSGATVELVDEQ               | 99  |
| Tden               | 3   | KTFVFNQKGGVGKTTSVINLGAYLALAG-----KKTLLIDF-DPQGNMSSGVGIQKKR-----PTIYDALAQKTSIKNTIYPTTVKN-LSAIPASIDLSGATVELVDEA             | 100 |
| Drad2.6            | 49  | KTIGVFNQKGGVGKTTTAVNLGAYLAAG-----RRVLVDM-DPQGNATSGLQORGAE-----QGLYEALGEPARSADFTLGTQKG-LDVLPATPDLAGAGVELADDP               | 146 |
| Ccre               | 7   | RVLAAANQKGGVGKTTTAVNLGTAWALG-----ERVLLIDA-DPQGNCSGTLGIGRT-----QRRTTYDVLMEGAPVDDAAVKTELPGLDVI PADADLSGVEIELGQTA            | 105 |
| Tfer               | 9   | RTVALANQKGGVGKTTTAVNLAAGLAQNG-----KRVLLIDL-DPQANATTGLGLG-G-----SATATLYHALIGELPLSAVLLNAFPEG-LSLAFSSPDLAGAEIELVYGRP         | 107 |
| Xfas               | 3   | RIIAATANQKGGVGKTTTAVNLAAGLVRAS-----ERVLLVDL-DSQGNATMGSGVDKN-----GLISSTCEVLLGERSVAESRARAPEG--FDLLPGNIDLTAATLQMEQS          | 101 |
| Paer               | 3   | KVFAATANQKGGVGKTTTCINLAASLVATK-----RRVLLLDL-DPQGNATTGSGIDKH-----NLEHSIDVLTGECNLAEAMQFSEHG-YQLLPANRDLTAAEVVLEMD            | 102 |
| Pput               | 3   | KVFAATANQKGGVGKTTTCINLAASLAATK-----RRVLLIDL-DPQGNATMGSGVDKH-----ELEHSYDVLITGECDLAQAMHYSEHG-FQLLPANRDLTAAEVVLEMQ           | 102 |
| Sput               | 3   | KVIAVANQKGGVGKTTTCVNLAASLAATK-----RKVLLIDL-DPQGNATMGSGVDKY-----EVENTAYELLVEKPFDDIVVKDTAGK-YDLIASNGDVTAAEIKLMEFF           | 102 |
| Vcho3.0            | 3   | KIVAATANQKGGVGKTTTCINLAASMAATK-----RKVLVVDL-DPQGNATMASGVDKY-----QVDSTAYELLVEDAPFDQVCRKTTGH-YDLIAANGDVTAAEIKLMEVF          | 102 |
| Cjej               | 3   | EIIITANQKGGVGKTTTAVNLAASLVAE-----KVVLLIDV-DPQANATTGLGFNRNN-----YEY-NIYHVFI GRKKLSDIILKTELPQ-LHLAFSNIGLVGIEQELAKG-         | 101 |
| Hpyl               | 4   | EIIAVANQKGGVGKTTTAVNLAASLAVHE-----KKILLIDF-DPQANATSSLGFRDRK-----IDY-DIYHVLI GRKQISQVILKTKMPF-LDLVPSNLGLAGFEKTFYDSQ        | 103 |
| megaplasmid (Dr) b | 120 | HRIALNNVSGGEGKTFILFHAFALADLG-----FRVAVDC-DPQASLTKRFGHLDEEG-----AHQSGAETILPVFVDDDPALPSPVTVGEGIDVWFPANRQLIDADRIMTN-         | 222 |
| Drad0.4 *          | 6   | KTLTVFNHAGGAGKTSLLTNVGYELARG-----LRVLLLDL-DPQANLTGWLGIS-GV-----TREMTVYPVAVDQQLPSPVKAFGLD----VIPAHVSLAVAEGQMMGRV           | 102 |
| megaplasmid (Dr) a | 3   | TILTVFTHAGGAGKTSIAGNIAHEFAQRG-----QHVLLIDG-DPQSNLTTNMGVQ-DA-----ELHETLFDVLVSGDAPLPAPRHVHGF--LIPAVIDLAEVEPSTIPGRV          | 99  |
| Vcho1.1 *          | 109 | WIINVNQKGGTGKSMIAVHLAAACLALNLDKR---YRICLIDL-DPQGSRLFLNLPQISLAEHTNIYSAVDIMLDNVPDGVQVDTFELRKNVMLPTQYPNLKTHSAFPEDAMFNABAWQYL | 225 |
| P1                 | 109 | YVIFISNLKGGVSKTVSTVSLAHAMRAHPHLLMEDLRILVIDL-DPQASATMFLSHKHSIGIVN-----ATSAQAMLQNVSREELLEEFIVPSVVPQ-VDVMPASIDDAFIASDWREL    | 220 |
| P7 (Ec)            | 110 | YVIFVNLKGGVSKTVSTVTLAHLRVHQDLLRHDLRILVIDL-DPQASSTMFLDHTHSIGSIL-----ETAQAQAMNLDLDAETLRKEVIRPTIIPG-VDVIPASIDDFVASQWKELV     | 221 |
| pMT1 (Yp)          | 110 | YVIFVNLKGGVSKTVSTVTLAHLRVHQDLLRHDLRILVIDL-DPQASSTMFLDHTHSIGTVL-----ETAQAQAMNLDLDAETLRREAVIRPTIIPG-VDVIPASIDDFVASQWESLV    | 221 |
| QpH1 (Cb)          | 116 | LTIATSNLKGGVSKTEAVDLGKKAIEG-----LRSLLDF-DAQGTATLISSGLIPDLELR-----YEDTITNTLISDPNNIKNVLKTHFDGFDIIPANLAIQDCDLIIPNDK          | 220 |
| pMOL28 (Re)        | 18  | KVIAVANFKGGVTKTMTSTLLCQGLSLRR----GRKVCHVDL-DPQGSATTLYGINPHAEVSS-----ENTIMPLI EAYLAGESFDMRGLPQETIYWPNDLIPSSTELFNAEFMLPARA  | 126 |
| F (Ec)             | 110 | PVIGVAAHKGGVYKTSVSVHLAQDLALKG-----LRVLLVGNPQGTASMYHGVPDLH-----IHAEDTLLPFYLGKDDVTYAIKPTCWPGLDIIPSCALHRIETELMGKF            | 214 |
| pO157 (Ec O157)    | 110 | PVIGVAAHKGGVYKTSVSVHLAQDLALKG-----LRVLLVGNPQGTASMYHGVPDLH-----IHAEDTLLPFYLGKDDVTYAIKPTCWPGLDIIPSCALHRIETELMGKF            | 214 |
| N15 (Ec)           | 107 | VVLSVMSHKGGVYKTSVAHQAWLALQG-----HRVLLVGNPQGTASMYHGVPDLH-----IHADDTLLPFYLGKRDAEYAIKPTCWPGLDIIPSCALHRIETELMQYH              | 211 |
| pCD1 (Yp)          | 107 | VVLAIAAHKGGAYKTSVSHIAQWMALQG-----LRVLLIDATDPQATASLYHGVPDLH-----IHEEDTLLPYLQGRDDAAYAIPKTCWPNVLEVIPSCALVHRIESEIYGLH         | 211 |
| pYVe227 (Ye)       | 121 | VVLAIAAHKGGAYKTSVSHIAQWMALQG-----LRVLLIDATDPQATASLYHGVPDLH-----IHEEDTLLPYLQGRDDAAYAIPKTCWPNVLEVIPSCALVHRIESEIYSLH         | 225 |

### Walker B

|                    |     |                                                                                                                            |     |
|--------------------|-----|----------------------------------------------------------------------------------------------------------------------------|-----|
| Lmon               | 100 | ----SREIRLKAIDS----IRDDYDYVIIDCPPSLGLLTLNALTAAADSVLIPVQCEYYALEGLSOLLNTRIRVQKHLN-----EDLQIEGVLLTMDLARTNLGIQVIEEVKKYFQNK     | 204 |
| Bsub               | 103 | ----SREVLRKRALEA----VKQNYDYIIDCPPSLGLLTLNALTAAADSVVIVPQCEYYALEGLSOLLNTRVRLVQKHLN-----TDLMEGVLLTMDLARTNLGIQVIEEVKKYFRDK     | 207 |
| Bant               | 103 | ----SREVLQRALQP----VRDEYDYIIDCPPSLGLLTLNALTAAADSVIIPVQCEYYALEGLSOLLNTRVRLVQKHLN-----KNLAIQGVLLTMDLARTNLGIQVIEEVKKYFRDK     | 207 |
| Bste               | 125 | ----SREIRLRNAIEP----LKDKYDFIIDCPPSLGLLTLNALTAAADSVLIPVQCEYYALEGLSOLLNTRVRLVQKHLN-----YDLRLEGVLLTMDLARTNLGLQVIEEVKKYFRDK    | 229 |
| Efae               | 103 | ----ARESRLKLAIDE----VRDMYDFVLDLDCPPSLGHLTTINASTASDILIPVQCEYYALEGLSOLLNTRVRLVQKHLN-----PELKEGVLLTMDLARTNLGAEVVEVRKYFRDK     | 207 |
| Cdif               | 103 | ----NREYLKNSIKA----VIDEYDYIFLDCPPSLGMLTINCLTAVDSVLIPVQCEYYALEGLSOLLNTRVRLVQKHLN-----ADIEIQGVLLTMDLARTNLGIQVIEEVKKYFRDK     | 207 |
| Cace               | 103 | ----NREIRLKNKIKI----MNKKFDYIFLDCPPSLGFITINSLTASNSVLIPVQCEYYALEGLSOLLNTRVRLVQKHLN-----KQLEVEGVLLTMDLARTNLGAEVVEVRKYFRDK     | 207 |
| Gsul               | 103 | ----ERERRLKAALAR----LSQRYDYIIDCPPSLGLLTLNALTAAADSVLIPVQCEYYALEGLSOLLNTRVRLVQKHLN-----PGLAIEGVLLTMDLARTNLGIQVIEEVKKYFRDK    | 207 |
| Rpro               | 102 | ----EREYVLMKLEEE----VKILYDYIIDCPPSLNLLTVNALVADSVLIPVQCEYYALEGLSOLLNTRVRLVQKHLN-----PKKIEGVLLTMDLARTNLGAEVVEVRKYFRDK        | 206 |
| Pgin               | 103 | ----EREKVMRLRLRG----IADRYDYVLDLDCPPSLGLITVNALVAHSVIVIPVQCEYYALEGLSOLLNTRVRLVQKHLN-----PTLEIEGVLLTMDLARTNLGAEVVEVRKYFRDK    | 207 |
| Ctep               | 104 | ----EREYVMQKALKQ----VRDQYDYIIDCPPSLGLITVNALVAHSVIVIPVQCEYYALEGLSOLLNTRVRLVQKHLN-----PKLEIEGVLLTMDLARTNLGAEVVEVRKYFRDK      | 208 |
| Scoe               | 100 | ----ARESRLQRAIT---A-YEQPLDYILDCPPSLGLLTVNALVAGQEVLPVQCEYYALEGLSOLLNTRVRLVQKHLN-----PTLHVSTILLTMDLARTNLGAEVVEVRKYFRDK       | 204 |
| Cdip               | 137 | ----RREYRLADALNDAFI-KEHGFYDFVLDLDCPPSLGLLTLNALTAAADSVLIPVQCEYYALEGLSOLLNTRVRLVQKHLN-----QNLHLSAILLTMDLARTNLGAEVVEVRKYFRDK  | 244 |
| Mavi               | 120 | ----ARENRLRTALAD--L-DNLDLFDYVLDLDCPPSLGLLTLNALTAAADSVLIPVQCEYYALEGLSOLLNTRVRLVQKHLN-----PQLEVSTVLLTMDLARTNLGAEVVEVRKYFRDK  | 225 |
| Mbov               | 157 | ----ARENRLRTALAA--L-DNDFDYVLDLDCPPSLGLLTLNALTAAADSVLIPVQCEYYALEGLSOLLNTRVRLVQKHLN-----PQLEVTTVLLTMDLARTNLGAEVVEVRKYFRDK    | 262 |
| Mtub               | 187 | ----ARENRLRTALAA--L-DNDFDYVLDLDCPPSLGLLTLNALTAAADSVLIPVQCEYYALEGLSOLLNTRVRLVQKHLN-----PQLEVTTVLLTMDLARTNLGAEVVEVRKYFRDK    | 292 |
| Mlep               | 120 | ----ARENRLRTALTE--L-DNLDLFDYVLDLDCPPSLGLLTLNALTAAADSVLIPVQCEYYALEGLSOLLNTRVRLVQKHLN-----PQLEVTTVLLTMDLARTNLGAEVVEVRKYFRDK  | 225 |
| Tden               | 100 | DR-----ELYLKKILAE-VKDTYDFILDCPPSLGILTLNGLTAAADSVLIPVQCEYYALEGLSOLLNTRVRLVQKHLN-----TALSIEGVLLTMDLARTNLGAEVVEVRKYFRDK       | 204 |
| Tden               | 101 | DR-----EFYLKNIIES-VKNEYDYILDCPPSLGILTLNGLTAAADSVLIPVQCEYYALEGLSOLLNTRVRLVQKHLN-----PALEIEGVLLTMDLARTNLGAEVVEVRKYFRDK       | 205 |
| Drad2.6            | 147 | D-----ALARLLA-SVQGYDLVLDAPPVSLGILTLNGLTAAADSVLIPVQCEYYALEGLSOLLNTRVRLVQKHLN-----PRLKIEGVLLTMDLARTNLGAEVVEVRKYFRDK          | 247 |
| Ccre               | 106 | ----RRSYRLRDALEA-IR-ANGPYTYVLDLDCPPSLNVLTVNALVADSVLIPVQCEYYALEGLSOLLNTRVRLVQKHLN-----PRLIEGVLLTMDLARTNLGAEVVEVRKYFRDK      | 212 |
| Tfer               | 108 | ----DRERRLQDALAP-VA-G---FDYALIDCPPALNMLTINALVAADSVLIPVQCEYYALEGLSOLLNTRVRLVQKHLN-----PRLIEGVLLTMDLARTNLGAEVVEVRKYFRDK      | 211 |
| Xfas               | 102 | ----EREQLRKRALSP-IR-HE---YDFILDCPPALNMLTINALVAADSVLIPVQCEYYALEGLSOLLNTRVRLVQKHLN-----PRLIEGVLLTMDLARTNLGAEVVEVRKYFRDK      | 206 |
| Paer               | 103 | ----MKENRLRNALAP-IR-EN---YDYILDCPPSLSMLTVNALVADSVLIPVQCEYYALEGLSOLLNTRVRLVQKHLN-----PTLKEGLLRTMDLARTNLGAEVVEVRKYFRDK       | 207 |
| Pput               | 103 | ----VKESRLRNALAP-IR-DN---YDYILDCPPSLSMLTVNALVADSVLIPVQCEYYALEGLSOLLNTRVRLVQKHLN-----PELKEGLLRTMDLARTNLGAEVVEVRKYFRDK       | 207 |
| Sput               | 103 | ----AREVRLRNALAP-IR-DQ---YDYIFLDCPPSLNMLTVNALVADSVLIPVQCEYYALEGLSOLLNTRVRLVQKHLN-----PGLIEGVLLTMDLARTNLGAEVVEVRKYFRDK      | 207 |
| Vcho3.0            | 103 | ----AREVRLKNALAS-VR-DN---YDFIFLDCPPSLNMLTVNALVADSVLIPVQCEYYALEGLSOLLNTRVRLVQKHLN-----DNLKEGLLRTMDLARTNLGAEVVEVRKYFRDK      | 207 |
| Cjej               | 102 | ----ENNEKKMLLNQIQE---VIDEYDFIIDSPPALGSLITVNALVADSVLIPVQCEYYALEGLSOLLNTRVRLVQKHLN-----SKLRVGFLLTMDLARTNLGAEVVEVRKYFRDK      | 209 |
| Hpyl               | 104 | DENKRGELMLKNALES---VGLYDYIIDSPPALGSLITVNALVADSVLIPVQCEYYALEGLSOLLNTRVRLVQKHLN-----PKLIEGVLLTMDLARTNLGAEVVEVRKYFRDK         | 212 |
| megaplasmid (Dr) b | 223 | ---MMRLGNLGEALDR---IQDQYDFILDLTRNVSPLLTASTAARLFLVPIGAHKG--LENLDELRLVVKLARKQD-----RSARIAFFIPNKVSTRMGKNVLSISAYTEVA           | 325 |
| Drad0.4 *          | 103 | G----AQGRLRRALAE---VSGDYDVALIDSPPSLGQLALLAALAADQMIIVPVPTRQKGLDALPGLQALTEYREVR-----PDLTVALYVPTFYDARRRHQEVLDLKAHLSPL         | 206 |
| megaplasmid (Dr) a | 100 | G----GILALRDALQK---ESGRWDTVIDSPPSLGQLAAACALAADLVPVIMTRSKGLNALRGLNRVMPQYHRLR-----PDLHVAAYVPTMCKSNRKEDELIGIVREDLPHV          | 203 |
| Vcho1.1 *          | 226 | SQN-QSLDIVRLLKEKLDKIASDFDIIMIDTGHVDPVWVWAMYASNALLIPCAAKRLDWASTVNFQHLPTVYEMFP---EDWKGLEFVRLMPTMFEEDNKKQVSLTEMNYLLGDQ        | 340 |
| P1 (Ec)            | 221 | NEHLPGQNIHVAVLKENVIDKLDKSDYDFILVDSGPHLDAFLKNALASANILFTPLPATVDFHSSSLKYVARLPELVKLSDEGC---ECQLATNIGFMSKLSNKAADHKYCHSLAKEVFGGD | 337 |
| P7 (Ec)            | 222 | EEHLPGQNYEILRRNIIDRVADDYDFIFIDTGHPLDPFLNGLAASDLLLTPPPAQVDFHSTLKYLRPEMELQLEEEGV---EPRLSASIGFMSKMTGKRDEHSHSLAREVYASN         | 338 |
| pMT1 (Yp)          | 222 | AEHLPGKPSVLRKTIIDRIAGDYDFIDTGHPLDPFLNGLAASDLLLTPPPAQVDFHSTLKYLRPEMELQLEEEGV---EPRLSASIGFMSKMTGKRDEHSHSLAREVYASN            | 338 |
| QpH1 (Cb)          | 221 | ENNDRLGSPFLRLAESLKIKNQYDYLIDCGPNLGLLTLNALTAAADSVLIPVQCEYYALEGLSOLLNTRVRLVQKHLN-----KLDYLRILLSKHN--SSNEALQENMMREQFGRY       | 333 |
| pMOL28 (Re)        | 127 | T-AEEGHIPFERVLSNGLDSLKDEYDYIILDAPTLSYLTINAIFAADGVIVPVPDPTLAFASMVQFQWLFSDLVGTGMEEQSRGSKKEFDLVDLMTLME--KKNAPRLVADWIRGVYGSR   | 244 |
| F (Ec)             | 215 | DEG-KLPTDPHMLRLAIETVAHDYDVIVDSAPNLGIGTINVVCAADVIVVTPAELFDYTSALQFFDMRDLLKNDLKG---FEPDVRILLTKYSNSNGSQSPWMEEQIRDAGWSM         | 329 |
| pO157 (Ec O157)    | 215 | DEG-KLPTDPHMLRLAIETVAHDYDVIVDSAPNLGIGTINVVCAADVIVVTPAELFDYTSALQFFDMRDLLKNDLKG---FEPDVRILLTKYSNSNGSQSPWMEEQIRDAGWSM         | 329 |
| N15 (Ec)           | 212 | SEG-KLPHPPHMLRAAIESVWDNYDIIVDSAPNLGIGTINVVCAADVIVVTPAELFDYASVLFQFTMLLDLLETVDLGG---FEPVRLILLTKYSNTGNQSRWMEEQIRNTWGAM        | 326 |
| pCD1 (Yp)          | 212 | DQG-KLPVAPHLLRAAIESVWDSYDVVLDLSDAPNLGIGTINVVCAADVIVVTPAELFDYVSTLQFFFTMLRDLLMSNIDLNG---FEPDVRVLLITKFSNAIGSQSQWMDQIRNAWGGM   | 326 |
| pYVe227 (Ye)       | 226 | DQG-KLPVAPHLLRAAIESVWDSYDVVLDLSDAPNLGIGTINVVCAADVIVVTPAELFDYVSTLQFFFTMLRDLLMSNIDLNG---FEPDVRVLLITKFSNAIGSQSQWMDQIRNAWGGM   | 340 |

|                    |     |                                                                                                       |     |
|--------------------|-----|-------------------------------------------------------------------------------------------------------|-----|
| Lmon               | 205 | VFNTIIPW-----NVRLSEAPSHGKPIILLYDAKSKGAEVYLELAKEVVAHG-----                                             | 250 |
| Bsub               | 208 | VYKTVLPR-----NVRLSEAPSHGKPIILYDPRSRGAEVYLDLAK EVAANG-----                                             | 253 |
| Bant               | 208 | VYRSIIPR-----NVRLSEAPSHGKPIIMQYDAKSRGAEVYIDLAEVVIAGG-----                                             | 253 |
| Bste               | 230 | VYQTIIPR-----NVRLSEAPSHGKPIILYDVKSRGAEVYLELAK EVL ERG-----                                            | 275 |
| Efae               | 208 | VYDTIIPR-----NVRLSEAPSHGLPIIDYDIRSKGAEVYQALAKEVLENERQRFQRHRCLVSRYRKARRCRR-----                        | 276 |
| Cdif               | 208 | VYTTLIPR-----NVRLAEAPSHGKPIIYYDKRCRGSVAYLELAEFFIDLEEEEW-----                                          | 257 |
| Cace               | 208 | LYNTTIPR-----NIRLAEAPSYGLPIVLVYDDKCRGAECYRNLN EFLSNQ-----                                             | 253 |
| Gsul               | 208 | AFQTVLPR-----NVRLSEAPSHGRPIILYDITSRGAVSYMELARELMTREVRRG-----                                          | 257 |
| Rpro               | 207 | VFKTVLPR-----NIKLEAPSYGKPAIILYDYKCAVAVYIELTKEILERYG EK-----                                           | 255 |
| Pgin               | 208 | VFDTVLR-----NIKLEAPSHGIPALLYDADSRGAVNHMQLAELIKKKHKQKGA-----                                           | 258 |
| Ctep               | 209 | VYKTYLRR-----NVRLSEAPSHGMPALLYDAQSIGSKDYLDLAEIFERDGNIRKFKVVRQQ-----                                   | 265 |
| Scoe               | 205 | VLRTSIPR-----SVRISEAPSYGQTVLTYDPGSSGALSYLEAAREIALKGVGVHL-----                                         | 255 |
| Cdip               | 245 | VLRTKIPR-----SVKVSEAPGYGQTVLDYDPGSRGAMAYLDAARELAQRGDYLP IEASGAVGMSPE SARRLQEQLDAQDGEQDQPEAADVINLETSKE | 338 |
| Mavi               | 226 | VLRTVLR-----SVKVSEAPGYSMTIIDYDPGSRGAMSYLDASRELAERD-----                                               | 271 |
| Mbov               | 263 | VLRTVLR-----SVKVSEAPGYSMTIIDYDPGSRGAMSYLDASRELAERDRPPSAKGRP-----                                      | 317 |
| Mtub               | 293 | VLRTVLR-----SVKVSEAPGYSMTIIDYDPGSRGAMSYLDASRELAERDRPPSAKGRP-----                                      | 347 |
| Mlep               | 226 | VLQTVLPR-----SVKVSEAPGYSMTIIDYDPGSRGAMSYLDASRELAERDQPPSMKG-----                                       | 278 |
| Tpal               | 205 | VFNTIIPR-----NVKLEAPSHGLPIISSYDAQCAGARSYEKLAAREIVARDGQR-----                                          | 253 |
| Tden               | 206 | VFSTIIPR-----NVRLSEAPSHGVPIICNYDAKCTGARSYEKLADEVLNRG-----                                             | 251 |
| Drad2.6            | 248 | VFWSVVR-----NVRLSEAPSFGKPIINAFAPLSSGAAAYKRLAEVLRQVEKI-----                                            | 296 |
| Ccre               | 213 | VYDAVLR-----NVRVSEAPSFGKPVLLYDLKCAQSAYLKLAREVISRERDRQAKAA-----                                        | 266 |
| Tfer               | 212 | LYQAVVPR-----NIRLAEAPSFGRALVYDPACAGSRAYQGVATEFLRREWMK-----                                            | 260 |
| Xfas               | 207 | VFRTIVPR-----NVRLAEAPSYGKSIIVGYDGASRGSVAYLGLANEVILRQKNRKKANVVEIN-----                                 | 264 |
| Paer               | 208 | LYSTVLR-----NVRLAEAPSFGMPALVYDKQSRGAIAYLALAGELVRRQRAKGRAATA-----                                      | 262 |
| Pput               | 208 | LYDTVLR-----NIRLAEAPSFGMPALAYDKQSRGALAYLALAGELVRRQRRPSRTAQTT-----                                     | 263 |
| Sput               | 208 | VYRTVLR-----NVRLAEAPSFGAPAMYDKSSAGAKAYLALAGEMIRRSEQNIQVKRA-----                                       | 262 |
| Vcho3.0            | 208 | VYRTVLR-----NVRLAEAPSHGKPAMYDKQSAGAKAYLALAGEMLRREEIPA-----                                            | 257 |
| Cjej               | 210 | LFTTINGNEDDFIVIPRNVKLAESPFGKPIILYDIKSPGSVAYQNLAYSILG-----                                             | 261 |
| Hpyl               | 213 | FFRDSATG-EYIMIPKSVKLAESPFGKPIILLYDIKSNGSIAVQKLAQSILQG-----                                            | 264 |
| megaplasmid (Dr) b | 326 | PISPPVRQ-----ATIGPEAEELFRGTTRHAPKSPLAGDIRTLANALVKATEQVEDAQ-----                                       | 378 |
| Drad0.4 *          | 207 | ARVPVQRE-----AVWLDSTAQGAPVSEYAPGTPVHADVQRLTADIAAAIGVAYPGENA-----                                      | 260 |
| megaplasmid (Dr) a | 204 | TSPIVERG-----AVWNGAAEKGLPVTVFAPRSKEAEEIRKITSDLVEFLQRNAPERGER-----                                     | 258 |
| Vcho1.1 *          | 341 | VMMATIPRS-----RAFETCADTYSTVFDLTVNDFEGGKKTALATAQDAVQKSALELERVLHSHWSSLNQG-----                          | 405 |
| P1 (Ec)            | 338 | MLDVFLPR-----LDGFERCGESFDTVLSANPATYVGSADALKNARIAAEDFAKAVFDRIEFIRSN-----                               | 398 |
| P7 (Ec)            | 339 | ILDSSLPR-----LDGFERCGESFDTVLSANPQSYPGSAEALKKARTEAERFTKAVFDRIEFVGEAA-----                              | 401 |
| pMT1 (Yp)          | 339 | ILDSSLPR-----LDGFERCGESFDTVLSANPVSYPGSAEALKKARTEAERFTKAVFDRIEYIRGASK-----                             | 401 |
| QpH1 (Cb)          | 334 | ILSNHMCETVEVSKAAN-EIGTIYDVSKPRGSR EAYRRALQHLDDVMEIINNFKDIWKSQVKVLTTLGETVNG-----                       | 406 |
| pMOL28 (Re)        | 245 | VLPIETPET-----DLARNSSIQFRTVYDLSSSEANTETMRRIRQPCDEFVDYVDDKVSALWQGIEE-----                              | 306 |
| F (Ec)             | 330 | VLKNVVRRET-----DEVGKGQIRMRTVFEQAIDQRSSTGAWRNALS IWE PVCNEIFDRLIKPRWEIR-----                           | 391 |
| pO157 (Ec O157)    | 330 | VLKNVVRRET-----DEVGKGQIRMRTVFEQAIDQRSSTGAWRNALS IWE PVCNEIFDRLIKPRWEIR-----                           | 391 |
| N15 (Ec)           | 327 | VLRQVVRVT-----DEVGKGQIKMRTVFEQAANQRSTLN AWRN AVEIWE PVCKEIFEDLIKPRWED-----                            | 387 |
| pCD1 (Yp)          | 327 | VLKEVVRVT-----DEVGKGQVRMRTVFEQAANQRSTPA AWRN AVS IWE PVC AEIFNRLVKPRWENA-----                         | 388 |
| pYVe227 (Ye)       | 341 | VLKEVVRVT-----DEVGKGQVRMRTVFEQAANQRSTPA AWRN AVS IWE PVC AEIFNRLVKPRWENA-----                         | 402 |
