# Supplementary material
Source: PubMed Central journal article supplement (PMC18974)
Supplement: pnas_97_26_14656__6.pdf [file pnas_97_26_14656__6.pdf]

|                                          |   |                                                                                                         |    |
|------------------------------------------|---|---------------------------------------------------------------------------------------------------------|----|
| Lmon; <i>Listeria monocytogenes</i>      | 1 | -----MAKGLGKGINALFN-----NVDI-----                                                                       | 18 |
| Bsub; <i>Bacillus subtilis</i>           | 1 | -----MAKGLGKGINALFN-----QVDL-----                                                                       | 18 |
| Bant; <i>B. anthracis</i>                | 1 | -----VAKGLGRGINVFFP-----DLVVK-----                                                                      | 19 |
| Bste; <i>B. stearothermophilus</i>       | 1 | -----VAKGLGKGISALFDNL-----SLNELNG-----                                                                  | 23 |
| Efae; <i>Enterococcus faecalis</i>       | 1 | -----                                                                                                   | 1  |
| Mavi; <i>Mycobacterium avium</i>         | 1 | -----MTQPLRKKGGLGRGLASLIPTG-----PAEGD-----AGPATLGPRMG-----DAAADVLIIGGPAPQEAS-----                       | 55 |
| Mbov; <i>M. bovis</i>                    | 1 | -----MTQPSRRKGGGLGRGLAALIPTG-----PADGE-----SGPPTLGPRMG-----SATADVVIIGGPVPDTS-----                       | 54 |
| Mtub; <i>M. tuberculosis</i>             | 1 | -----MTQPSRRKGGGLGRGLAALIPTG-----PADGE-----SGPPTLGPRMG-----SATADVVIIGGPVPDTS-----                       | 54 |
| Mlep; <i>M. leprae</i>                   | 1 | -----MTQSLCKKGGGLGRGLASLIPTG-----PVDAD-----SGPATYGPQMG-----NTAADVLIIGGSAQKDN-----                       | 54 |
| Cdip; <i>Corynebacterium diphtheriae</i> | 1 | -----MAQETRKGGGLGRGLAALITSS-----PSAGSRIGDTAADVVFVGGPSTTPPKPGEKKKPEAPKPAAKRHRSGGNINPILADVESHREEESAVRERTQ | 93 |
| Scoe; <i>Streptomyces coelicolor</i>     | 1 | -----MPRRPWGARLSAAPGAMPLL-----PNERG-----VAAAKVATLQHVS-----RETEELTAPQGVGLRP-----                         | 55 |
| Cdif; <i>Clostridium difficile</i>       | 1 | -----MENKSKRSNRLGRGLSALIP-----EIKGETS-----                                                              | 27 |
| Cace; <i>C. acetobutylicum</i>           | 1 | -----MNKKGGGLGRGLNALIV-----DTDVKEE-----                                                                 | 23 |
| Rpro; <i>Rickettsia prowazekii</i>       | 1 | -----MVKNKGLGRGLSSLLG-----E-EVLP-----                                                                   | 21 |
| Hpyl; <i>Helicobacter pylori</i>         | 1 | -----MAKNKVLGRGLADIFPEIN-----EVYEQGLYER-----                                                            | 29 |
| Cjej; <i>Campylobacter jejuni</i>        | 1 | -----MGLNKDRGLSSLLIS-----DMDTVYSKELG-----                                                               | 25 |
| Ctep; <i>Chlorobium tepidum</i>          | 1 | -----MSKKALGRGLKALISEE-----GFAVAEKAETEK-----                                                            | 30 |
| Pgin; <i>Porphyromonas gingivalis</i>    | 1 | -----MKHTKKTLGRGLDSLLD-----A-EVIG-----                                                                  | 22 |
| Gsul; <i>Geobacter sulfurreducens</i>    | 1 | -----MAALLPVV-----EEEGKRYFS-----                                                                        | 17 |
| Drad2.6; <i>Deinococcus radiodurans</i>  | 1 | -----MSKSSSLGRGLDALLTK-----K-GEPVAQA-----                                                               | 25 |
| Tpal; <i>Treponema pallidum</i>          | 1 | -----MGKDKLGKGLDALLQES-----SDRYDVRDS-----                                                               | 26 |
| Tden; <i>T. denticola</i>                | 1 | -----VAKKSALGRGLNALLEEQ-----PANQIVESLN-----                                                             | 28 |
| Ccre; <i>Caulobacter crescentus</i>      | 1 | -----MSEGRRLGRGLSACWAS-----RR-RAGSGPG-----                                                              | 27 |
| Paer; <i>Pseudomonas aeruginosa</i>      | 1 | -----MAAKKRGLGRGLDALLGG-----SSPAKLQEEAVQ-----                                                           | 30 |
| Pput; <i>P. putida</i>                   | 1 | -----MAVKKRGLGRGLDALLSG-----PSVSALEEQAVK-----                                                           | 30 |
| Sput; <i>Shewanella putrefaciens</i>     | 1 | -----MTLKKRGLGKGLDALLSHS-----HAANKKQTEEVAVV-----                                                        | 33 |
| Vcho3.0; <i>Vibrio cholerae</i>          | 1 | -----MTKRGLGKGLDALLATSSLAREKQQVASLSQSM-----                                                             | 33 |
| Xfas; <i>Xylella fastidiosa</i>          | 1 | -----MNKPSPLKKRGLGRGLEALLGSK-----GGSSVPPTVAEGQ-----                                                     | 37 |
| Tfer; <i>Thiobacillus ferrooxidans</i>   | 1 | -----MKRVGLGRGLDALFAS-----EG-GAG-----                                                                   | 21 |
| megaplasmid (Dr) b †                     | 1 | -----MSRKLPPKAAISPLSLR-----QLMDEHEGVS-----                                                              | 28 |
| Drad0.4                                  | 1 | -----MTRRRPERRRDLLGLLG-----ETPVDS-----                                                                  | 24 |
| megaplasmid (Dr) a †                     | 1 | -----MTRREGLAALLG-----ESAKLAQG-----                                                                     | 20 |
| pMOL28 (Re; <i>Ralstonia eutropha</i> )  | 1 | -----MSLREKLAAKAGNIKVTAEDLEKAAARGPQAPRTAPGQLMHHMQGKVERQANEIAQLR-----                                    | 57 |
| QpH1 (Cb; <i>Coxiella burnetii</i> )     | 1 | -----MDNSKRNIHNSGPLGMLMKNQIKKTENSAESNEGTVVLNKAAPSYFKT-----                                              | 49 |
| F (Ec; <i>Escherichia coli</i> )         | 1 | -MKRAPVVPKHTLNTQPVEDTSLSTPAAPMVDSL IARVG---VMARGNAITLPVCGRD-----VK                                      | 56 |
| pO157 (Ec O157)                          | 1 | -MKRAPVVPKHTLNTQPVEDTSLSTPAAPMVDSL IARVG---VMARGNAITLPVCGRD-----VK                                      | 56 |
| N15 (Ec)                                 | 1 | -MKNRSILKNAPNIETFMSNNHNAPQKAPSVSPMVGDLQSKLSSLSGNSITLPVCGRN-----VT                                       | 59 |
| pCD1 (Yp; <i>Yersinia pestis</i> )       | 1 | -MKRSPVLRNAPSINFDDAKPAISNAEPSVSAPAVSQLASRVSGMKGNTIVLPVCGRN-----VA                                       | 59 |
| pYVe227 (Ye; <i>Y. enterocolitica</i> )  | 1 | MMKRSVLRNAPSINFDDAKPAISNAEPSVSAPAVSQLASRVSGMKGNTIVLPVCGRN-----VA                                        | 60 |
| Vcho1.1 *                                | 1 | -----MAIKTSELNAKLFKADKRRATTPAEAQSAVKAQAQMIELAVAGEEVVT-----                                              | 49 |
| P1 (Ec)                                  | 1 | -----MSKKNRPTIGRTLNPSTLSGFDSSASGDRVEQVFKLSTG-----RQAT                                                   | 44 |
| P7 (Ec)                                  | 1 | -----MKKIVSRGRVLGKNSSEFARMLEGSEGTFTTLKSGRQ-----AK                                                       | 40 |
| pMT1 (Yp)                                | 1 | -----MKQVIARGRVLGNSNSEFARMLEGDGDVKTFTTLKSGVQ-----AR                                                     | 40 |

ParB box I

ParB box II

|                      |    |                                                                                                                                                                                                                                             |     |
|----------------------|----|---------------------------------------------------------------------------------------------------------------------------------------------------------------------------------------------------------------------------------------------|-----|
| Lmon                 | 19 | ----NEETVQNI A I K E I K P N P Y Q P R K I F D A ----K A I N E L R D S I K I H G V L Q P I I L R N - T D K G ----Y E I V V G E R R Y R A A K E A K L K E I P A V V R - D L T E E E M M E L S V I E N L Q R E D L S P L E                    | 122 |
| Bsub                 | 19 | ----SEETVE E I K I A D L R P N P Y Q P R K H F D D ----E A L A E L K E S V L Q H G I L Q P L I V R K - S L K G ----Y D I V A G E R R F R A A K L A G L D T V P A I V R - E L S E A L M R E I A L L E N L Q R E D L S P L E                  | 122 |
| Bant                 | 20 | ----EEETVQ E I V I T E L R P N P Y Q P R K H F N K ----E A I Q E L S A S I K E H G I L Q P L I A R K - S I K G ----Y E I V A G E R R Y R A A K E A G L E K V P A V V R - Q L N E Q Q M M E F A L L E N L Q R E D L N P M E                  | 123 |
| Bste                 | 24 | ----KEETVEV S I H D L H P N P Y Q P R K T F Q P ----E A I E E F K Q S I L Q H G I L Q P L I V R R - V P I G ----Y E I V V G E R R Y R A A K E A N L P S V P V V V R - E L T D E Q M M E F A L L E N L Q R E D L N P I E                     | 127 |
| Efae                 | 1  | ----VT E I L L N E L R P N P Y Q P R K T F D E ----T S L Q E L A N S I L H S G V F Q P I I V R K S A V K G ----Y E I I A G E R R F R A S K L A G K E K I P A I I R - E F D E E S M M Q V A V L E N L Q R E D L N P L E                      | 101 |
| Mavi                 | 56 | ----P V G A V Y R E I S P A D I E R N P R Q P R Q V F D E ----E A L A E L V H S I R E F G L L Q P I V V R A I K E S A S G A R Y Q I V M G E R R W R A A Q E A G L A T I P A I V R - E T G D D N L L R D A L L E N I H R V Q L N P L E       | 165 |
| Mbov                 | 55 | ----V M G A I Y R E I P P S A I E A N P R Q P R Q V F D E ----E A L A E L V H S I R E F G L L Q P I V V R S L A G S Q T G V R Y Q I V M G E R R W R A A Q E A G L A T I P A I V R - E T G D D N L L R D A L L E N I H R V Q L N P L E       | 164 |
| Mtub                 | 55 | ----V M G A I Y R E I P P S A I E A N P R Q P R Q V F D E ----E A L A E L V H S I R E F G L L Q P I V V R S L A G S Q T G V R Y Q I V M G E R R W R A A Q E A G L A T I P A I V R - E T G D D N L L R D A L L E N I H R V Q L N P L E       | 164 |
| Mlep                 | 55 | ----A M G A V Y R E I A L S D I T E N P C Q P R Q V F D D ----E A M S E I V H S I R E F G L L Q P I V V R P A S G S C G D T R Y Q I V M G E R R W R A A Q Q A G L S F I P A I V R - A T G D D S M L R D A L L E N I H R V Q L N P L E       | 164 |
| Cdip                 | 94 | E Q L E E F G A T Y R E I P V G M I V P N E K N P R S V F D E ----D D L S E L V H S I K E F G L I Q P I V V R R V K E S P - D E R Y E I I M G E R R R A S S K A G L P T I P A I V R - Q T D D S D M L R D A L L E N I H R V Q L N P L E     | 206 |
| Scoe                 | 56 | ----P M G A H F A E V P L D A I T P N P K Q P R K D F D D ----D A L A E L V T S I R E V G L L Q P V V V R P T E P G R ----Y E L I M G E R R F R A C R E L E D A I P A I V R - A T E D E K L L L D A L L E N L H R A Q L N P L E             | 161 |
| Cdif                 | 28 | ----E K E I V N - I D I D K I Y P N E V Q P R K Q F D E ----E K I K V L S D S I K N Y G V L Q P I V V K M D E N N K ----Y M I I A G E R R F R A S K L A N K N Q I P A I I K - D I D M K D I M E I A L I E N L Q R E D L N S I E             | 131 |
| Cace                 | 24 | ----E N S S S Q K I S L N L I K P N E G Q P R K N F D S ----E K I V Q L A E S I K E H G I V Q P L V L K K - K G K Q ----Y I I V A G E R R F R A A K S L G L K E V P A V I I - D A T E K E I L E I S L I E N I Q R E D L N P I E             | 127 |
| Rpro                 | 22 | ----T E S E I V Q I I N I D K I K P N E N Q P R K H F E Y ----N K I K E L A D S I L N N G L L Q P I I I D N ----N F Q I I V G E R R W R A C K L A K V L E I P V I I K - N F P T R E S M E V A L I E N I Q R T D L T V M E                   | 123 |
| Hpyl                 | 30 | ----A N R V E L G I D E V M P N P Y Q P R K V F S E ----D S L E E L A Q S I K E H G L L Q P V L V V S E N G ----R Y H L I A G E R R L R A S K L A K M P T I K A I V V - D I E Q E K M R E V A L I E N I Q R E D L N P L E                   | 132 |
| Cej                  | 26 | ----F D K N Q S T M I E I D Q I S P N P F Q P R K N F D Q ----E A L D E L A N S I K E F G L I Q P I I V F K K N N ----K F I I A G E R R L R A V K A L G K K E I L A F I A - D I E N K L R E L A L I E N I Q R E N L N P I E                 | 130 |
| Ctep                 | 31 | ----M Q D G V I G S L P V E K I K V N P F Q P R Q A F E E ----T A L N E L R N S I I E N G V I Q P V T V C R D G E ----G Y L L I S G E R R L R A V K S A G F K F I P A Y V I E A H E D A S K L E L A L I E N I Q R E D L N A I E             | 136 |
| Pgin                 | 23 | ----S S S I S E V A I S D I Y P N P D Q P R R T F E E ----E S L K E L A A S L R S I G L V Q P T I L L K K S A G ----D Y M I I S G E R R W R A A R M A G M T T L P A Y I K - T E E D E H V M E M A L I E N I Q R E D L N A I E               | 126 |
| Gsul                 | 18 | -----C P I E D I R P H K N Q P R K T F V P ----E K L E E L A A S I R E K G I I Q P L V V R K - K G D ----H Y E L I A G E R R W R A A Q K A G L R E V P V I Q - D V S E D T A L E M A L I E N I Q R E D L N A V E                            | 114 |
| Drad2.6              | 26 | ----G T G T Q V Q T L K I E R I A Q A A Y Q P R Q V F E P ----E S L A E L A Q S I R E K G V L Q P L L V R P R G - D ----A F E I V A G E R R W R A S Q L A G L T E L P V M I R - D L G D R E A L E I A I V E N L Q R E D L G P L E           | 130 |
| Tpal                 | 27 | ----G G V Q T V H Y L D P T L L Q A N P H Q A R R T F A Q ----E S L E E L A A S I R E H G V I Q P V L A E K - N Q D G ----S W V I I A G E R R T R A A I L A G L N R I P V I V R - T C D H E K K L A I A L I E N V Q R E N L N P L E         | 132 |
| Tden                 | 29 | ----T S E D S I I N I D P K L I Q N P Y Q P R K T F D E ----E K I S E L A E S I K E H G I I Q P I V A E K - H E D K ----G Y F I I A G E R R T R A A I S L G L E T V P V I L R - S F E K K K L E V A L I E N I Q R E D L N A I D             | 134 |
| Ccre                 | 28 | ----E Q F G G S R E A P I E I L Q R N P D Q P R R T F R E ----E D L E D L S N S I R E K G V L Q P I L V R P S P D T A G ----E Y Q I V A G E R R W R A A Q R A G L K T V P I M V R - E L D D L A V L E I G I I E N V Q R A D L N V L E       | 135 |
| Paer                 | 31 | ----A D R R E L Q Q I P L D L M Q R G K Y Q P R R D M D P ----Q A L E E L A Q S I K A Q G V M Q P I V V R P I A - N G --R Y E I I A G E R R W R A S Q Q A G L E K I P A I V R - D V P D E A A I A M A L I E N I Q R E D L N P I E           | 136 |
| Pput                 | 31 | ----I D Q K E L Q H L P V E L V Q R G K Y Q P R R D M D P ----E A L E E L A H S I R N H G V M Q P I V V R P I G - D N --R Y E I I A G E R R W R A T Q Q A G L D T I P A M V R - E V P D E A A I A M A L I E N I Q R E D L N P L E           | 136 |
| Sput                 | 34 | ----E K K E E L I H L D L D L I Q P G K Y Q P R K D M S P ----E A L E E L A H S I R N Q G I I Q P I V V R P V S - E T --Q Y E I I A G E R R W R A S Q L A G V D K I P C I V K - P V P D E A A V A I A L I E N I Q R E D L N A M E           | 139 |
| Vcho3.0              | 34 | ----S A E G E L A D L S I S N L K P G I Y Q P R K D L S P ----E A L E E L A A S I Q S G I I Q P I V V R H L P - T G --G Y E I I A G E R R W R A A Q A G L K Q V P C L I K - Q V E D R G A I A M A L I E N I Q R E D L N A M E               | 139 |
| Xfas                 | 38 | ----L P G E V L R T L Q I T Q I Q P S K Y Q P R R E M S E ----P K L A E L I P S I K A Q G Q P I P A F G R V G - V D --M F E I A G E R R R R A A A L T E S D Y R V L V G - E L D D R T V V A M A L I E N I Q R E D L N P L E                 | 143 |
| Tfer                 | 22 | ----A A M R E V P L D V I Q R G R Y Q P R G L I S A ----E S L E E L T A S I R S Q G V V Q P I V I R A I G - G G --R Y E I V A G E R R W R A A Q L A G L S H I P A V V R - E C S D E Q A L A I G I I E N I Q R Q A L N P L E                 | 124 |
| megaplasmid (Dr) b † | 29 | ----V I A L D E I E V I P G F N P R S V I E S E S P F T P ----Q A L D D L T E S I R S N G L L Q P L L R P G P T G ---K Y I L V A G E R R L H A S R L A G L V A V P A L V R - D M N P E A D E F A L Q E N L Q R S D L S N D A                | 134 |
| Drad0.4              | 25 | ----Q A N D I R A L P V N E L K V G S T Q P R R S F D L ----E R L S E L A E S I R A H G V L Q P L L V R S V D G ----Q Y E I V A G E R R W R A A Q L A G L A E V P V V V R - Q L S N E Q A R A A A L I E N L Q R D N L N V I D               | 128 |
| megaplasmid (Dr) a † | 21 | ----P V V G H T S T L R V D Q L R A G S Q P R R Q F G T ----E G L T E L A A S I Q S G I L Q P L L V R A V G D ----T Y E I V A G E R R W R A A Q L A G L T E V P V I V K - S L T D Q E A A V I A L I E N L Q R E N L N L I D                 | 125 |
| pMOL28 (Re)          | 58 | -A E E S A R V S G A V D V P I D Q L H E V P G R R R F M P P ----E K Y V E L R E N L R H N K L V H P V I V C P R P A G ----G F E I V S G H H R T D A Y R E L G R D H I R C V L G - E L S S D E A D T G A F Y A N L M Q S D L T D F E        | 167 |
| QpH1 (Cb)            | 50 | ----Q A G I E F T E H E L I F V D P K E C E F W E Y A N R Q D E E L G N I N E L I E S I K S N K Q L Q P A L I R K H P H P H D D V K Y E I I F G R R R H I A C L N L G I P F L A I L K E - I P N V Q D A I A F Q D A E N K L R N D V S N Y S | 164 |
| F (Ec)               | 57 | F T L E V L R G D S V E K T S R V W S - G N E R D Q E L L T E ----D A L D D I L I P S F L L T G Q Q T P A F G R R V S G ----V I E I A D G S R R R K A A A L T E S D Y R V L V G --E L D D E Q M A A L S R L G N D Y R - P T S A Y E         | 162 |
| pO157 (Ec O157)      | 57 | F T L E V L R G D S V E K T S R V W S - G N E R D Q E L L T E ----D A L D D I L I P S F L L T G Q Q T P A F G R R V S G ----V I E I A D G S R R R K A A A L T E S D Y R V L V G --E L D D E Q M A A L S R L G N D Y R - P T S A Y E         | 162 |
| N15 (Ec)             | 60 | F K L E T I P A D K V E K A T M V W L - G N E R D Q E L L N E ----S A L A D L I P S F L T S G Q Q N P A F A R R T S G ----I I E I A D G S R R R K A I I T G S D Y R V L V G --E L D D E Q M Q Q L S Q L G N D Y R - P T S A Y E             | 165 |
| pCD1 (Yp)            | 60 | F T L K V I A A P D V E S K T I V F S - G N E R N Q A L L S E ----T S L D D L I P S F L T S G Q Q I P A F A R E H N G ----N I E V A D G S R R R K A A I L T G S D Y K V L V G --N L N D E Q M L W L S Q I A N E Y R - P T S A Y E           | 165 |
| pYve227 (Ye)         | 61 | F T L K V I A A P D V E S K T I V F S - G N E R N Q A L L S E ----T S L D D L I P S F L T S G Q Q I P A F A R E H N G ----N I E V A D G S R R R K A A I L T G S D Y K V L V G --N L N D E Q M L W L S Q V A N E Y R - P T S A Y E           | 166 |
| Vcho1.1 *            | 50 | -F E L M R I P A D E V A E K T V V F A Q N A R E Q A F L T E ----H A L A D V L T T L R E R G Q Q Y P A V G R K T A D G ---K I E V L D G S R R R M S C I L A G K E F L V Y V A E - N I N A E H A K F L S D V A N A H K - P L S L Y E         | 157 |
| P1 (Ec)              | 45 | F I E E V I P P N Q V E S D T F V D Q H N G R D Q A S L T P ----K S L K S I R S T I K H Q - Q F Y P A I G V R R A T G ----K I E I L D G S R R R A S A I L E N V G L R V L T D Q E I S V Q E A Q N L A K D V Q T A L - Q H S I R E           | 153 |
| P7 (Ec)              | 41 | F L L T V V L S G E I E S R T F V D P A V N G R D Q S L L T P ----E S V S D I S R T I K L Q - Q F F P A I G R M V G E ----R I E V L D G S R R R A C I F N E T K F E I L V T K D E I S L A D A R Q L A I D I Q T A R - E H T L R E           | 148 |
| pMT1 (Yp)            | 41 | F V K T V V L S G E V E S K T F V D A S V N G R D Q T M L T R ----E S V S D I S R T I K L Q - Q F F P A I G R E V N G ----L I E I L D G T R R R A C I F N N V K F E I L V T K D I S L A D A R Q L A K D I Q T A R - E H S L R E             | 148 |

|                      |     |                                                                                                                         |     |
|----------------------|-----|-------------------------------------------------------------------------------------------------------------------------|-----|
| Lmon                 | 123 | EAESYQFLMKKLS--LTQAKLAERVGKSRPYIANFVRLTLPEEVQVMLRDGSLGAGHGRVLLGLKL-KKN-----IIPAKKAVAQGLTVRQLEDVNNLNENVS-----            | 220 |
| Bsub                 | 123 | EAQAYDSLKHLDD--LTQEQLAKRLGKSRPHIANHLRLLTLPENIQQLAEGTLSMGHGRTLLGLKN-KNK-----LEPLVQKVIAEQLNVRQLEQLIQLNQNPV-----           | 220 |
| Bant                 | 124 | EAMAYQMLMNLN--VTQEQLAKCLGKSRPYIANYTRLLSLPSFVQDMANGQLSMAHGRTLLTIKD-EEQ-----LKSLLKRTEKGLNVRQLEKIVQEQINQSVS-----           | 221 |
| Bste                 | 128 | EAMAYKMLMDKLH--LTQEEVASRVGKSRPHIANHLRLLSLPSDVQKLLIDGTLGSMGHGRALLGLKQ-KSK-----MKSTIVERTIREGLNVRQLEKLIQQANENVS-----       | 225 |
| Efae                 | 102 | EAEAYEMLMKNLK--LTQAEVAERLGGKSRPYIANYLRLTLDPVAKAMVQKQSMGQARTLLGLKN-KEQ-----LLPLANRCIKDNLTVRQLEQLVAELNETQG-----           | 199 |
| Mavi                 | 166 | EAAAQQLLDEFG--VTHDELAARIGRSRPLITNMIRLLKLPVAVQRRVAAGVLSAGHARALLSLEAGPEA-----QEELATRIVAEGLSVRATTEAVTLANRAG-----           | 263 |
| Mbov                 | 165 | EAAAQQLLDEFG--VTHDELAARIGRSRPLITNMIRLLKLPVAVQRRVAAGVLSAGHARALLSLEAGPEA-----QEELASRIVAEGLSVRATTEAVTLANHEAN-----          | 263 |
| Mtub                 | 165 | EAAAQQLLDEFG--VTHDELAARIGRSRPLITNMIRLLKLPVAVQRRVAAGVLSAGHARALLSLEAGPEA-----QEELASRIVAEGLSVRATTEAVTLANHEAN-----          | 263 |
| Mlep                 | 165 | EAAAQQLLDEFE--VTHDELASRIGRSRPLITNMIRLLKLPVAVQRRVAAGVLSAGHARALLSLEANPEV-----QEELASRIIAEGLSVRATTEAVKLANHEVN-----          | 263 |
| Cdip                 | 207 | EAAAQQLLEEFQ--VTQNELADRLGSRPVTITNMIRLLGLPVDVQRKVAAGVLSAGHARALLSVKAGEDT-----QAELAQRITAEGLSVRATTEAVTLNLRGE-----           | 304 |
| Scoc                 | 162 | EAFAYDQLLKDFN--CTHDQLADRIGRSRPQVSNLRLKLPKPVQNRVAAGVLSAGHARALLSVDD-PEE-----QDRLAHRIVAEGLSVRSVEEIVTLMGSRPQ-----           | 259 |
| Cdif                 | 132 | EALAYKSLIEHYN--VTQEEISEAVGKSRPHITNTLRLNLGQDVTIEMDSGRITAGHGKALLRIAD-KDL-----QLQIAKKIEEELSREVENIAKKISENKQ-----            | 229 |
| Cace                 | 128 | EALAYKRLLEDNF--LTQEQLSQRIGKSRVAIANCIIRLLNLDERVQEYLIDGVTISEGHGRVLLSIAD-KEL-----QYKISQKIIDEDLSVRATEKLLKTYKETTE-----       | 225 |
| Rpro                 | 124 | EARGFKYLVENFN--YIVKELAEERLGGKSRSHIANLRLNQLPSIQDKLNENILSMGHARCLINHEY-----AELIADHIINHDLNVRQTEALVRQWHKN-----               | 216 |
| Hpyl                 | 133 | LARSYKELLESYQ--MTQEELSKIVKKSRAHVANIMRLTLSSKVQNALLEEKITSGHAKVLVGLDG--EK-----QELILNSIIGQKLSVRQTEDLARDFKIN-----            | 227 |
| Cjej                 | 131 | LANSYKDLMQVHK--ITQENLAELIHKSRTOITNTLRLNLDIRTQELIASGKISQGHAKVLVGLDQKDEK-----MLVDSIIGQKLNVRDTEKIVKIKINN-----              | 225 |
| Ctep                 | 137 | VALALRSLVTKCN--LTQDEVAQKVGKNRSTVANFLRLKLPKQIQDSIRTREISSGHARALINLPS-----EHLQKVVQRIMARQLSVRQTEALVNMFKDKP-----             | 234 |
| Pgin                 | 127 | ISLAYQKLIETYD--LTQEELSTRVGKKRTTISNYLRLKLPGEIQIGLTQKKIDMGHARALLSIPD-PEH-----QLALYAEIIRQGLSVRAVESLAAHYREE-----            | 222 |
| Gsul                 | 115 | EAEAYHALMENFG--LTQEELAKRVGKDRSTIANSLRLKLPVELKRDIVEERLAMGHARAVLALDS-DAQ-----IKEARDAIKGNLTVRAEGLVKRLKAG-----              | 210 |
| Drad2.6              | 131 | EARAYQALLDQG--LNQEGVAQAVGKGRSTVTNALRLLTLPEPVLRAIDEGSLASASHARAVLTQPE--AD-----RLWAFEQIRSRGLNVRRAEALKREKRG-----            | 223 |
| Tpal                 | 133 | EARAYQHIMDLGN--LSHEELAQRVGKNRSTITNALRLLKLPPEVQQLSSRTLSAGHARALLSLTD-MQL-----CVSVAQYVVTHALSVRAAECCVACLNRGGSLHDYAGARAHTAAS | 244 |
| Tden                 | 135 | EALAYQEIIMELAA--INQEELAKRVGKSRSAITNSLRILKLPPEMKDALRVNKITAGHARALLSIVN-PAD-----QKILFSRIESELVRAEASMAADLNSG-----            | 230 |
| Ccre                 | 136 | EALSXYVLMKEFF--RTQENIAQTIIGKSRSHVANTMRLALPEQVQSYLVSGELTAGHARALLAAAD--P-----VALAKQIEGGLSVRETEALARKAPN-----               | 227 |
| Paer                 | 137 | EAAAQQLLDEFG--VTHDELAARIGRSRPLITNMIRLLKLPVAVQRRVAAGVLSAGHARALLSLEAGPEA-----QEELATRIVAEGLSVRATTEAVTLANRAG-----           | 263 |
| Pput                 | 137 | EAMALQRLQEFQ--LTQQQVADAVGKSRVTVANLRLITLPEDAIKTMLAHGDEMGHARALLGLDE--NR-----QEEGARHVVARGLTVRQTEALVRQWLSLSD-----           | 231 |
| Sput                 | 140 | EAIALQRLMQEFE--LTHQQVADVVGKSRASVSNLRLNGLNEPVRKLELYGDIEMGHARALLAIEG--EE-----QTNLARLVAAKELTVRETERLINQTLN-----             | 233 |
| Vcho3.0              | 140 | EAQALQRLQNEFN--LTHQQVAEIVGKSRVTVTNLRNLRLNQLSDDVKRLLLETQKLEMGHARALLMLEG--EQ-----QVEIAQQVAKKQLTVRQTEQLVKKCLS-----         | 233 |
| Xfas                 | 144 | EAQALQRLIDEFS--LTHAEAAEAVGRSRAAVSNLRLLELPLGIRTLQSRRLLEMGHARALLTLAP--EL-----ADKLAKEAADQGWSVREVEHRAQQFAAGKV-----          | 240 |
| Tfer                 | 125 | EAQALQRLDEFG--LSHEALAESLGRSRAAISNQLRLLRCPDLHPHVENGALSAGHARALLTLPD--GR-----VQVIAERVVREALSVRATERLVQAEGR-----              | 218 |
| megaplasmid (Dr) b † | 135 | KALLAIRAVARHMN-VPEDQTVLVAGRIKKTGLDPERLGDMLRRSFG-IVSVSTFAQRYGKFLQLNPAERQVLLLEGRYGISALAPLAQLPDTTEERRQLDLRLVTG-----        | 236 |
| Drad0.4              | 129 | EVDGKLELIALTLGLEREERKRLMQLLRAVPGEDEHQDQVFRSMG-ETWRTFAKNKLRILNWPQPVLEA-----LRAGLPLTLGSSVVASAPPERQAEELKLAQNG-----         | 229 |
| megaplasmid (Dr) a † | 126 | EVEGKLLLVANALGIASEQARSRLNELLRNVPEDVETLSAVFLPLGRESWQSFANKKVRILNYPPLVEA-----LRQGMALTMATLIRAPENKQADLIKAVQGG-----           | 227 |
| pMOL28 (Re)          | 168 | KFRKFDLLELLRTP-DKIQAAIAEQAGVPVSTLSEILSFRNLPEVLSLDSRPDLGNSNAGAEELARATKDG---RGDRVVEAVKLLAEKKIDQQQAVRMTKAEQ-----           | 267 |
| QpH1 (Cb)            | 165 | NAILYKRLIEEG-VFKKEKDLAEKLRSLPSTLNDLMAYTKIPSAIVKRIIPNIHALSKSIVLKIIVQLLNKSSKNHAKLIAIAPDIGKSITSPAKLESAREKPVGS-----         | 267 |
| F (Ec)               | 163 | RGQRYASRLQNE-FAGNISALADAENISRKIIITRCINTAKLPKSVVLFVSHPGELSARSGDALQKAFDTK-----EELLKQASNLHEQKAGVIFEAEEVITLLT-----          | 262 |
| pO157 (Ec O157)      | 163 | RGQRYASRLQNE-FAGNISALADAENISRKIIITRCINTAKLPKSVVLFVSHPGELSARSGDALQKAFDTK-----EELLKQASNLHEQKAGVIFEAEEVITLLT-----          | 262 |
| N15 (Ec)             | 166 | RGKRYLRRLK-E-FDGNVKALAEAEAGIDRNIIVNRCMNTAGLPREILSIFKHPGELSARAGDALSKVYKGN-----EQTMLDGAQQLLRMKQAGEDFEPARIIQALQ-----       | 264 |
| pCD1 (Yp)            | 166 | RGLRYAQRLLISE-FEGNISKLAEAEHLRSLIQRCKTAGLPLKTIQLFANPNELARSGEALSKAYENN-----VDTLKRVTTHKIMKQKQEGRQFTTEELIVLLM-----          | 265 |
| pYve227 (Ye)         | 167 | RGLRYAQRLLISE-FEGNISKLAEAEHLRSLIQRCKTAGLPLKTIQLFANPNELARSGEALSKAYENN-----VDTLKRVTTHKIMKQKQEGRQFTTEELIVLLM-----          | 266 |
| Vcho1.1 *            | 158 | KGKEMQAKLDSGE-AEDQKALAKMFCSEALVSGALKAAALPLELLQAYPSVVELGRPTIVKLLHKQPNELN-----EAQREQLLAKCHQENGFWVQSQSQAGVAR-----          | 256 |
| P1 (Ec)              | 154 | IGLRLMRMKNNG--MSQKDIAAKEGLSQAQVTRALQAASAPPELVALFPVQSELTFSDYKTLCAVGDEMGNKNLEFDQLIQNISPEINDLSIIEMAEDEVKNKILR-----         | 258 |
| P7 (Ec)              | 149 | LGKRFEVMYG---KSMTKEEIARAENISKAKVTRAFQAAAAPDEMIAVFPVASDLALPDYQLLLQISEDANAKSVPIEELVDTVRERIAET-EGAKEDKAKILAIK-----         | 251 |
| pMT1 (Yp)            | 149 | LGKRLEVTYG---TSMTKEDIALKENLSPAKVTRAFQAAAAPDEMIAVFPVINDLSLSDYQFLKLLAEANNKQTSVTELMEKVVQHRLTKTMPDYPADKSKILAVIR-----        | 252 |

|                      |     |                                                                                                                                                       |                              |                                   |                            |     |
|----------------------|-----|-------------------------------------------------------------------------------------------------------------------------------------------------------|------------------------------|-----------------------------------|----------------------------|-----|
| Lmon                 | 221 | -----RETIK-----PARVP----IFIREQSQ-----LRDKFGTAVS                                                                                                       | IKRRDK-KGKTEIEFLSDDDLDRI     | LEILDIQFDDE-----                  | 283                        |     |
| Bsub                 | 221 | -----RETKK-----K--EPVKD----AVLKERESY-----LQNYFGTTVNI                                                                                                  | KRQKK-KGKTEIEFFSNEDLDRI      | LELLSERES-----                    | 282                        |     |
| Bant                 | 222 | -----RETKQ-----V--KKERN----IFFIERETF-----LREKFGTDV                                                                                                    | KIKETKKEKGIETIEFFNKEDLNRI    | LELLAQKN-----                     | 283                        |     |
| Bste                 | 226 | -----RETSKR-----K--PPEKS----VFIRESESL-----LREKFGTNVT                                                                                                  | TIKQTRK-RGKTEIEFFSPEDLERI    | LELLDVRFDE-----                   | 289                        |     |
| Efae                 | 200 | -----KKGKA-----KKAIKEKP----IYIRESEDR-----LMDKFGTTVA                                                                                                   | IQEKEG-KGKTEIEYLSSSDLARI     | LDILDHFDEE-----                   | 266                        |     |
| Mavi                 | 264 | -----TTTTPTPRRKPIQM----PGLQDVADR-----LSTAFDTRVTV                                                                                                      | SLGKR-KGKIVVEFGSVDDLQRI      | IDVMAPPKP-----                    | 328                        |     |
| Mbov                 | 264 | -----RQAHSDATTPAPRRKPIQM----PGLQDVAER-----LSTTFDTRVTV                                                                                                 | SLGKR-KGKIVVEFGSVDDLARI      | VGLMTDGRDKGLHRDAL-----            | 344                        |     |
| Mtub                 | 264 | -----RQAHSDATTPAPRRKPIQM----PGLQDVAER-----LSTTFDTRVTV                                                                                                 | SLGKR-KGKIVVEFGSVDDLARI      | VGLMTDGRDKGLHRDAL-----            | 344                        |     |
| Mlep                 | 264 | -----RVN--REVITPVPQRRKPICM----PGLQDVAER-----LSNAFDTRV                                                                                                 | MVSLGKR-KGKIVVEFSSVDDLQRI    | VDVMTTYKT-----                    | 333                        |     |
| Cdip                 | 305 | -----KPAPK--KREKTPTP----EFLTHAADR-----LADDLDTKVSV                                                                                                     | SMGKR-KGKIVVEFGGREDFERI      | MGLLGEH-----                      | 367                        |     |
| Scoe                 | 260 | -----K-----PQRAGPRAGSLVS----PALSDLATR-----LSDRFETR                                                                                                    | VKVDLQK-KGKIVVEFASMDLERI     | LGSLAPGEGPVLQKGLLEGEDEDGDAES----- | 344                        |     |
| Cdif                 | 230 | -----EEPKK-----SKPKD----FILDVEDK-----LRNIFGTKVNI                                                                                                      | SKGK-KGKIEIYYNDLNSI          | VMLE-----                         | 287                        |     |
| Cace                 | 226 | -----KNDEE-----SKEEN----QYIVDIRNK-----LEGYFGTKVLL                                                                                                     | KTNKN-KGKIEIYYSNEDLQRI       | IDILKI-----                       | 283                        |     |
| Rpro                 | 217 | -----EYKSSNNNNKVDKLCVKDNVIDNDLELLVKA--L--S--K--K--F--G--I--K--I--T--I--D--N--C--R--L--G--G--K--L--M--F--H--Y--K--N--L--E--E--L--D--L--L--S--K--L--N-- |                              |                                   | 286                        |     |
| Hpyl                 | 228 | -----ANFDNKKHGFQQTQTLIAGDELER-----LNQSLWDHYK                                                                                                          | LKAALK-GNKIVLRCYENSL         | EAFMKKMS-----                     | 290                        |     |
| Cjej                 | 226 | -----ESLPN-----QEFEDEIKK-----LKQILNRF                                                                                                                 | GFDCNK-NNDFVIHLENIDKIKK      | LKMLEKL-----                      | 278                        |     |
| Ctep                 | 235 | -----KTASPAPAPR----AVQIDQIEAR-----IRERLATKVS                                                                                                          | LVLEKKGQGETHIKYFSGEDLDRI     | LELIGQ-----                       | 294                        |     |
| Pgin                 | 223 | -----GADSPAKQKTKQSLPEEYRLLTG----QLSRFFRTKVK                                                                                                           | LDCDAKGGKLTIPFASEEELER       | IMALLERIR-----                    | 289                        |     |
| Gsul                 | 211 | -----ARTGAKATAD----VHSADLVEQ-----LQRRLMTRV                                                                                                            | VIRRGGR-GGKIEIAFGNQEEL       | SRIVDMLIA-----                    | 269                        |     |
| Drad2.6              | 224 | -----RDKGQGAPIKVN--PPRAYRQLELD-----LSRRTGT                                                                                                            | RVKITGEDKG--RVELNYGSREE      | LDRIQLILGYEAAE-----               | 288                        |     |
| Tpal                 | 245 | SPSPGGSATDITRLPSS--PSTDAQLDARIRN----ADIADIEQQ-----LLEQLG                                                                                              | TKVRISGNLQ-RGRIEITYFSQAE     | LERIYGLLKAH-----                  | 324                        |     |
| Tden                 | 231 | -----IGRITKKQKKE--TQSLSTDDFELR-----DIEQQ-----FINS                                                                                                     | LGTKVQIKGNL-KGVVEISYFSKDD    | DMYKINS-----                      | 297                        |     |
| Ccre                 | 228 | -----LSAGKSKGGRPPRVKDTDTQALESD-----LSSVLGLD                                                                                                           | VSIDHRGST-GTLTITYATLEQL      | DDLNCNRLTRGI-----                 | 293                        |     |
| Paer                 | 232 | -----PGKPAGPVKS----DPDIARLEQR-----LAERLGS                                                                                                             | VQIRHGQKGGQLVIRYNSLDEL       | QVLAHIR-----                      | 290                        |     |
| Pput                 | 232 | -----KPDVPVPSKP----DPDIARLEQR-----LAERLGS                                                                                                             | VQIRHGNGKGGQLVIRYNSLDEL      | QVLAHIR-----                      | 290                        |     |
| Sput                 | 234 | -----PPKPVETTTK----DQDVCRLQQ-----LIERLG                                                                                                               | AKVSIHSSKGGKIVINYQNLA        | ELDGLSKIR-----                    | 292                        |     |
| Vcho3.0              | 234 | -----DPSDAKNVSE----DLEIQQLSQN-----LSEKLA                                                                                                              | AKVSIVRTPNGKSVTISLDEPHK      | LELLIAKLQN-----                   | 293                        |     |
| Xfas                 | 241 | -----PDIRD-----KKS--SPASAPA----QPDIASLETE-----LSEHL                                                                                                   | GTKVAINHGRAGKGLVIHYTDL       | DVLDGVLRLRARVAD-----              | 310                        |     |
| Tfer                 | 219 | -----IKAPKAEP----DANVAALSAR-----IAARLGL                                                                                                               | PVLDLRAQGRG-GELRIRWENPEQ     | EALFQYLVSLDDDESGYSALDGLHRRV-----  | 294                        |     |
| megaplasmid (Dr) b † | 237 | -----QLSAAELHLEVTRLKRGAVPDR-----TLDR                                                                                                                  | LKSAIPQLRRLSGKRRQAERL        | LDQLLELTESSSHDGNR-----            | 303                        |     |
| Drad0.4              | 230 | -----ASRSQLLQALQTPSQTSAVTPEH-----FAKVL                                                                                                                | SskrFLSGLDTPREALDRWL         | ARMPEVRVQAIDEQS-----              | 293                        |     |
| megaplasmid (Dr) a † | 228 | -----AGRKEI                                                                                                                                           | VAEVERLCHRPTVRLKR-----       | YQALGNQKWLDRLDPQDAEAMQHWSQM       | PRALQOEIGN-----            | 291 |
| pMOL28 (Re)          | 268 | -----VKTRPAASTG----FKIKAGKAT-----WCDV                                                                                                                 | RIAKKVMRIEFRSEEEAEAAQSGT     | REHLEGLAKAASEDAKS-----            | 331                        |     |
| QpH1 (Cb)            | 268 | -----KTKQRLQATK----QYKTKDGKKLFT-----FKID                                                                                                              | HRGAPCIVLNKEILNVDMDTMC       | EKIKSQEIELSQSGAPD-----            | 334                        |     |
| F (Ec)               | 263 | -----SVLKTSSASRTS----LSSRHQFAPG-----ATV                                                                                                               | LYKGDKMVLNLDNRVPT            | ECIEKIEAILEKEKPPAP-----           | 323                        |     |
| pO157 (Ec O157)      | 263 | -----SVLKTSSASRTS----LSSRHQFAPG-----ATV                                                                                                               | LYKGDKMVLNLDNRVPT            | ECIEKIEAILEKEKPPAP-----           | 323                        |     |
| N15 (Ec)             | 265 | -----DFILVDKEEMP-----KTEKKGEG-----V                                                                                                                   | VAKYKGSFVTLKVDSRKIPSNLIKKEAL | EALGAEEQVNRDLDKLENIKKNKEKK-----   | 342                        |     |
| pCD1 (Yp)            | 266 | -----PERKQOPENIHK-----KSFQGN-----L                                                                                                                    | EAKYKDNVSFYLS--VPESLVKQIEEL  | INTYAKEHSL-----                   | 320                        |     |
| pYVe227 (Ye)         | 267 | -----PERKQOPENIHK-----KSFQGN-----L                                                                                                                    | EAKYKDNVSFYLS--APESLVKQIEEL  | INTYAKEHSL-----                   | 321                        |     |
| Vcho1.1 *            | 257 | -----ITKEVTETIESWIQDVLPPKRTETP-----K                                                                                                                  | VELIKGRASYARKGNLVLNLKKIDDEL  | MQDILDFVQRKLN-----                | 323                        |     |
| P1 (Ec)              | 259 | -----LITKEASLLTDKSGSKDSVVTELWKFEDKD-----R                                                                                                             | FARKRVKGRAFYSYFNRLSKELQEEL   | DRMIGHILRKSLDKPKP-----            | 333                        |     |
| P7 (Ec)              | 252 | -----AESKSLKAPVK----SVVVEKLRDFSRRQYARKKSD                                                                                                             | PKKRVVAYEFSRLPSEVQTE         | IDEAIKKIGKMSAGE-----              | 321                        |     |
| pMT1 (Yp)            | 253 | -----SESKLLTALPTR---TVQTEK                                                                                                                            | LRFSDRNQFARKKTDPKKRLV        | VYVYFVSRI                         | SABQSEIDKAKRILERLPESE----- | 323 |
